# Supplementary material
Source: Elsevier journal article supplement (https://researchonline.lshtm.ac.uk/id/eprint/2182499/1/mmc1.pdf)
Supplement: mmc1 [file mmc1.pdf]

| Age   | Birth decade     |                  |                  |                  |                  |                  |                  |
|-------|------------------|------------------|------------------|------------------|------------------|------------------|------------------|
|       | 1910-1919        | 1920-1929        | 1930-1939        | 1940-1949        | 1950-1959        | 1960-1969        | 1970-1979        |
| 40-44 |                  |                  |                  |                  | 42.4 (21.6-63.2) | 37.5 (25.7-49.3) | 51.6 (22.4-80.9) |
| 45-49 |                  |                  |                  | *                | 36.9 (27.6-46.2) | 35.6 (28.5-42.8) |                  |
| 50-54 |                  |                  |                  | 21.6 (14.2-29.1) | 31.7 (27.0-36.5) | 40.0 (33.0-47.0) |                  |
| 55-59 |                  |                  | 22.6 (20.2-25.0) | 25.3 (21.9-28.7) | 31.0 (28.1-33.9) |                  |                  |
| 60-64 |                  | 15.2 (12.7-17.7) | 16.4 (13.2-19.5) | 21.9 (18.8-25.0) | 29.7 (18.9-40.4) |                  |                  |
| 65-69 | 12.1 (9.5-14.7)  | 13.9 (11.2-16.5) | 14.6 (12.0-17.1) | 19.2 (16.5-21.9) |                  |                  |                  |
| 70-74 | 15.4 (13.0-17.8) | 12.1 (8.8-15.3)  | 14.1 (11.4-16.7) | 17.8 (10.9-24.8) |                  |                  |                  |
| 75-79 | 14.8 (10.9-18.6) | 16.2 (13.6-18.7) | 13.6 (10.4-16.7) |                  |                  |                  |                  |

**Table 2** Prevalence of myopia (Spherical Equivalent  $\leq$  -0.75 Diopters) against birth year stratified by age. Individuals aged 40 to 79 included. (\* = meta-analysis not possible due to single contributing prevalence estimate)
